# Supplementary material for: Aphids and Ants, Mutualistic Species, Share a Mariner Element with an Unusual Location on Aphid Chromosomes
Source: MDPI journal article supplement (doi:10.3390/genes12121966), 2021-12-09
Supplement: s1 [file s1]

SUPPLEMENTARY MATERIAL

Aphids and ants, mutualistic species, share a *mariner* element with an unusual location on aphid chromosomes

Vela, J., Montiel, E.E, Mora, P. Lorite, P., Palomeque, T.

Supplementary Table 1. Oligonucleotides used for *mariner* PCR amplifications.

| mariner family | Oligonucleotide | Sequence (5' - 3')            |
|----------------|-----------------|-------------------------------|
| <i>Myrmar</i>  | Mrug-MAR        | CCAGGTCTGTAAATATGAAACCGGAAT   |
| <i>Mboumar</i> | ITR-MAR         | CCAGGTGTGTCGGTAATTCCTTTCCGG   |
| <i>Sinvmar</i> | Sinv-mar-1      | TTAGGTGTTAAACTTAATTCCTGCCGCT  |
|                | Sinv-mar-2      | AATTGAAGGTAACCTTAATTCCTGCCGTT |
| <i>Azteca</i>  | Azteca-1        | CGAGGTTTGTTAAAAAAAAGGTGA      |
|                | Azteca-2        | CGAGGTGTGATCAAAAAGTAAGGTGA    |
|                | Azteca-3        | CGAGGTTTGTTAAAAAAAAAAAAAGTGA  |
|                | Azteca-4        | CGAGGTGTGTTCAAAAAAAGGTGA      |

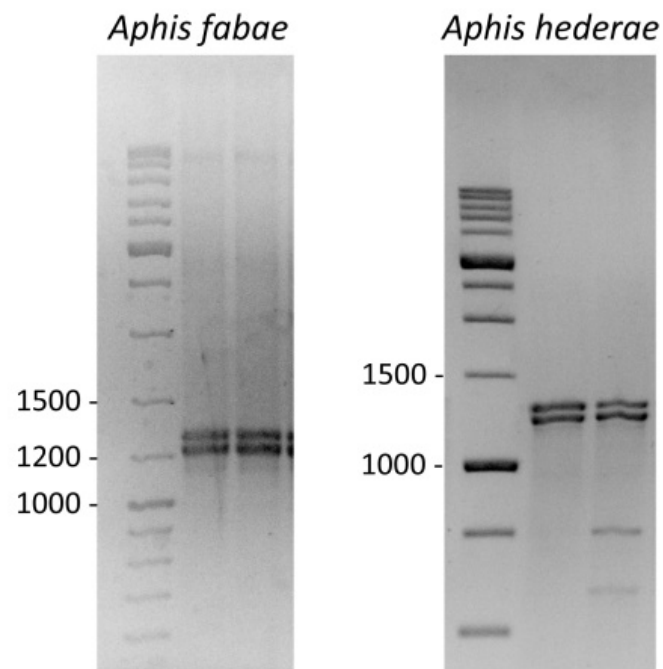

**Figure S1.** Agarose gel showing the PCR amplification of genomic DNA from *A. fabae* and *A. hederae* using primers based in the ITRs from *Myrmar* elements. The numbers indicate the size of DNA fragments in bp.



|               | 210                                                                                                  | 220   | 230   | 240   | 250   | 260   | 270   | 280   | 290   | 300   |
|---------------|------------------------------------------------------------------------------------------------------|-------|-------|-------|-------|-------|-------|-------|-------|-------|
| AfabmarMr-50  | ATTTGCGGACAGCCCTACTTTTCTGTTTTCATCTGAAGAAAACCGCAGCGGAATCGCATCGAATGCTTCCGGAGGCATTTGGTGAGCATGCTCTCGGTAA |       |       |       |       |       |       |       |       |       |
| AfabmarMr-54  | .....                                                                                                | ..... | ..... | ..... | ..... | ..... | T     | ..... | ..... | ..... |
| AfabmarMr-57  | .....                                                                                                | ..... | ..... | ..... | ..... | ..... | T     | ..... | ..... | ..... |
| AfabmarMr-13  | .....                                                                                                | ..... | ..... | ..... | ..... | ..... | T     | ..... | ..... | ..... |
| AfabmarMr-25  | .....                                                                                                | ..... | ..... | ..... | G     | ..... | T     | ..... | ..... | ..... |
| AfabmarMr-51  | .....                                                                                                | ..... | ..... | ..... | ..... | ..... | T     | G     | ..... | ..... |
| AfabmarMr-55  | .....                                                                                                | ..... | ..... | ..... | ..... | ..... | T     | ..... | ..... | ..... |
| AfabmarMr-58  | .....                                                                                                | ..... | ..... | ..... | ..... | ..... | T     | ..... | C     | ..... |
| AfabmarMr-26  | .....                                                                                                | ..... | G     | ..... | ..... | ..... | T     | ..... | ..... | ..... |
| AfabmarMr-27  | .....                                                                                                | ..... | ..... | ..... | ..... | ..... | T     | ..... | ..... | ..... |
| AfabmarMr-65  | .....                                                                                                | T     | ..... | ..... | G     | ..... | T     | ..... | ..... | ..... |
| AfabmarMr-76  | .....                                                                                                | T     | ..... | ..... | G     | ..... | T     | ..... | G     | ..... |
| AfabmarMr-10  | .....                                                                                                | T     | ..... | ..... | G     | ..... | T     | ..... | ..... | ..... |
| AfabmarMr-96  | .....                                                                                                | T     | ..... | ..... | G     | ..... | T     | ..... | ..... | ..... |
| AfabmarMr-59  | .....                                                                                                | T     | ..... | ..... | G     | ..... | T     | ..... | ..... | ..... |
| AfabmarMr-94  | .....                                                                                                | T     | ..... | ..... | G     | ..... | T     | ..... | ..... | ..... |
| AfabmarMr-12  | .....                                                                                                | T     | ..... | ..... | G     | ..... | T     | ..... | ..... | ..... |
| AfabmarMr-63  | .....                                                                                                | T     | ..... | ..... | G     | G     | T     | ..... | ..... | ..... |
| AfabmarMr-144 | .....                                                                                                | T     | ..... | ..... | G     | ..... | T     | ..... | ..... | ..... |
| AhedmarMr-700 | .....                                                                                                | ..... | ..... | ..... | ..... | ..... | T     | ..... | C     | ..... |
| AhedmarMr-707 | .....                                                                                                | ..... | ..... | T     | ..... | ..... | T     | ..... | C     | ..... |
| AhedmarMr-712 | .....                                                                                                | ..... | ..... | ..... | ..... | ..... | T     | ..... | C     | ..... |
| AhedmarMr-713 | .....                                                                                                | ..... | ..... | ..... | ..... | ..... | T     | ..... | C     | ..... |
| AhedmarMr-9   | .....                                                                                                | T     | ..... | G     | G     | ..... | T     | G     | ..... | C     |
| AhedmarMr-33  | .....                                                                                                | T     | ..... | G     | G     | ..... | T     | ..... | ..... | ..... |
| AhedmarMr-51  | .....                                                                                                | T     | ..... | G     | G     | ..... | T     | ..... | ..... | ..... |
| AhedmarMr-61  | .....                                                                                                | T     | ..... | G     | G     | ..... | T     | ..... | ..... | ..... |
| AhedmarMr-74  | .....                                                                                                | T     | ..... | G     | G     | ..... | T     | ..... | ..... | ..... |
| AhedmarMr-77  | .....                                                                                                | T     | ..... | G     | G     | ..... | T     | ..... | ..... | ..... |
| AhedmarMr-293 | .....                                                                                                | T     | ..... | G     | G     | ..... | T     | ..... | ..... | ..... |
| AhedmarMr-301 | .....                                                                                                | T     | ..... | G     | G     | ..... | T     | ..... | ..... | ..... |
| AhedmarMr-544 | .....                                                                                                | T     | ..... | G     | G     | ..... | T     | ..... | ..... | ..... |
| AhedmarMr-808 | .....                                                                                                | T     | ..... | G     | G     | ..... | T     | ..... | ..... | ..... |
| AhedmarMr-815 | .....                                                                                                | T     | ..... | G     | G     | ..... | T     | ..... | ..... | ..... |
|               | 310                                                                                                  | 320   | 330   | 340   | 350   | 360   | 370   | 380   | 390   | 400   |
| AfabmarMr-50  | AACACAGTGTTCGAGTGGTTTGAACGATTCAAAAGTGGCGATTTTGACGTGAGGAACGAAGAACGTGGTAGACCACCGAAAAAGTTTGAAGACGCTGAC  |       |       |       |       |       |       |       |       |       |
| AfabmarMr-54  | .....                                                                                                | ..... | ..... | ..... | ..... | ..... | ..... | ..... | ..... | ..... |
| AfabmarMr-57  | .....                                                                                                | ..... | ..... | ..... | ..... | ..... | ..... | ..... | G     | ..... |
| AfabmarMr-13  | .....                                                                                                | ..... | ..... | ..... | ..... | ..... | ..... | T     | ..... | ..... |
| AfabmarMr-25  | .....                                                                                                | ..... | ..... | ..... | ..... | ..... | ..... | ..... | ..... | ..... |
| AfabmarMr-51  | .....                                                                                                | ..... | ..... | ..... | ..... | ..... | ..... | ..... | ..... | ..... |
| AfabmarMr-55  | .....                                                                                                | ..... | ..... | ..... | ..... | ..... | ..... | ..... | ..... | ..... |
| AfabmarMr-58  | .....                                                                                                | ..... | ..... | ..... | ..... | ..... | ..... | ..... | ..... | ..... |
| AfabmarMr-26  | .....                                                                                                | ..... | ..... | C     | ..... | ..... | ..... | ..... | ..... | ..... |
| AfabmarMr-27  | .....                                                                                                | ..... | ..... | ..... | ..... | ..... | ..... | ..... | ..... | ..... |
| AfabmarMr-65  | .....                                                                                                | ..... | A     | G     | ..... | ..... | ..... | G     | ..... | ..... |
| AfabmarMr-76  | .....                                                                                                | ..... | A     | G     | ..... | ..... | ..... | G     | ..... | ..... |
| AfabmarMr-10  | .....                                                                                                | ..... | A     | G     | ..... | ..... | ..... | G     | ..... | ..... |
| AfabmarMr-96  | .....                                                                                                | ..... | A     | G     | ..... | ..... | ..... | G     | ..... | ..... |
| AfabmarMr-59  | .....                                                                                                | ..... | A     | G     | ..... | T     | ..... | G     | ..... | ..... |
| AfabmarMr-94  | .....                                                                                                | ..... | A     | G     | ..... | ..... | ..... | G     | ..... | ..... |
| AfabmarMr-12  | .....                                                                                                | ..... | A     | G     | ..... | ..... | ..... | G     | ..... | ..... |
| AfabmarMr-63  | .....                                                                                                | ..... | A     | G     | ..... | ..... | ..... | G     | ..... | ..... |
| AfabmarMr-144 | .....                                                                                                | ..... | A     | G     | ..... | ..... | ..... | G     | ..... | ..... |
| AhedmarMr-700 | .....                                                                                                | ..... | ..... | ..... | ..... | ..... | ..... | G     | ..... | ..... |
| AhedmarMr-707 | .....                                                                                                | ..... | ..... | ..... | ..... | ..... | ..... | ..... | ..... | ..... |
| AhedmarMr-712 | .....                                                                                                | ..... | ..... | ..... | ..... | ..... | ..... | ..... | ..... | ..... |
| AhedmarMr-713 | .....                                                                                                | ..... | ..... | ..... | ..... | ..... | ..... | ..... | ..... | ..... |
| AhedmarMr-9   | .....                                                                                                | ..... | A     | G     | ..... | ..... | ..... | G     | ..... | ..... |
| AhedmarMr-33  | .....                                                                                                | ..... | A     | G     | ..... | ..... | ..... | G     | ..... | ..... |
| AhedmarMr-51  | .....                                                                                                | ..... | A     | G     | ..... | ..... | ..... | G     | ..... | ..... |
| AhedmarMr-61  | .....                                                                                                | ..... | A     | G     | ..... | ..... | ..... | G     | ..... | ..... |
| AhedmarMr-74  | .....                                                                                                | ..... | A     | G     | ..... | ..... | ..... | G     | ..... | ..... |
| AhedmarMr-77  | .....                                                                                                | ..... | A     | G     | ..... | ..... | ..... | G     | ..... | ..... |
| AhedmarMr-293 | G                                                                                                    | ..... | A     | G     | ..... | ..... | ..... | G     | ..... | ..... |
| AhedmarMr-301 | .....                                                                                                | ..... | A     | G     | ..... | ..... | ..... | G     | ..... | ..... |
| AhedmarMr-544 | .....                                                                                                | A     | A     | G     | ..... | ..... | ..... | G     | ..... | ..... |
| AhedmarMr-808 | .....                                                                                                | ..... | A     | G     | ..... | ..... | ..... | G     | ..... | ..... |
| AhedmarMr-815 | .....                                                                                                | ..... | A     | G     | ..... | ..... | ..... | G     | ..... | ..... |

|               | 410                                        | 420                                                     | 430 | 440  | 450 | 460 | 470 | 480 | 490 | 500 |
|---------------|--------------------------------------------|---------------------------------------------------------|-----|------|-----|-----|-----|-----|-----|-----|
| AfabmarMr-50  | CTGCAAGCCTTGTGGACGAAGACGACGCTCGAACACAACAAC | TGGCCGGATCAGTTAAAGGTGACCCGGGAAGCCATCTCCCTTCGGTTGAAAGCCA |     |      |     |     |     |     |     |     |
| AfabmarMr-54  |                                            |                                                         | A.  | G.   |     |     |     |     |     |     |
| AfabmarMr-57  |                                            |                                                         | A.  |      |     |     |     |     |     |     |
| AfabmarMr-13  |                                            |                                                         | A.  |      |     |     |     |     |     |     |
| AfabmarMr-25  |                                            |                                                         | A.  |      |     |     |     |     |     |     |
| AfabmarMr-51  |                                            |                                                         | A.  |      |     |     |     |     |     |     |
| AfabmarMr-55  |                                            |                                                         | A.  |      |     |     |     | C.  |     |     |
| AfabmarMr-58  |                                            |                                                         | A.  |      |     |     |     |     |     |     |
| AfabmarMr-26  |                                            |                                                         | A.  |      |     |     |     |     |     |     |
| AfabmarMr-27  |                                            |                                                         | A.  |      |     |     |     |     |     |     |
| AfabmarMr-65  |                                            |                                                         | A.  | AAC. | G.  |     |     |     | C.  |     |
| AfabmarMr-76  |                                            |                                                         | AG. | AAC. | G.  |     |     |     |     |     |
| AfabmarMr-10  |                                            |                                                         | A.  | AAC. | G.  |     |     | C.  |     |     |
| AfabmarMr-96  |                                            |                                                         | A.  | AAC. |     |     |     |     |     |     |
| AfabmarMr-59  |                                            |                                                         | A.  | AAC. |     |     |     |     |     |     |
| AfabmarMr-94  |                                            |                                                         | A.  | AAC. |     |     |     |     |     |     |
| AfabmarMr-12  |                                            |                                                         | A.  | AAC. |     |     |     |     | C.  |     |
| AfabmarMr-63  |                                            |                                                         | A.  | AAC. |     |     |     |     |     |     |
| AfabmarMr-144 |                                            |                                                         | A.  | AAC. |     |     |     |     |     |     |
| AhedmarMr-700 |                                            |                                                         | A.  |      |     |     |     |     |     |     |
| AhedmarMr-707 |                                            |                                                         | A.  |      |     |     |     |     |     | T.  |
| AhedmarMr-712 |                                            |                                                         | A.  |      |     |     |     |     |     |     |
| AhedmarMr-713 |                                            |                                                         | A.  |      |     |     |     |     |     |     |
| AhedmarMr-9   |                                            |                                                         | A.  | AAC. |     |     |     |     |     |     |
| AhedmarMr-33  |                                            |                                                         | A.  | AAC. |     |     |     |     |     |     |
| AhedmarMr-51  |                                            |                                                         | A.  | AAC. |     |     |     |     |     |     |
| AhedmarMr-61  |                                            |                                                         | A.  | AAC. |     |     |     |     |     |     |
| AhedmarMr-74  |                                            |                                                         | A.  | AAC. |     |     |     |     |     |     |
| AhedmarMr-77  |                                            |                                                         | A.  | AAC. |     |     |     |     |     |     |
| AhedmarMr-293 |                                            |                                                         | A.  | AAC. | G.  |     |     |     |     |     |
| AhedmarMr-301 |                                            |                                                         | A.  | AAC. |     |     |     |     |     |     |
| AhedmarMr-544 |                                            |                                                         | A.  | AAC. |     |     |     |     |     |     |
| AhedmarMr-808 |                                            |                                                         | A.  | AAC. |     |     |     |     |     |     |
| AhedmarMr-815 |                                            |                                                         | A.  | AAC. |     |     |     |     |     |     |

|               | 510                                                                                                | 520 | 530 | 540 | 550 | 560 | 570 | 580 | 590 | 600 |
|---------------|----------------------------------------------------------------------------------------------------|-----|-----|-----|-----|-----|-----|-----|-----|-----|
| AfabmarMr-50  | TGGGAAAGATACAAAAGGCGGGGAAATGGGTTCACATGAACTCAACGAAAGACAGCAGGAAACCGCAAAACATCATGCGAAATGCTGCTCGCCAGGTT |     |     |     |     |     |     |     |     |     |
| AfabmarMr-54  |                                                                                                    |     |     |     |     |     |     |     |     |     |
| AfabmarMr-57  |                                                                                                    |     |     |     |     |     |     |     |     |     |
| AfabmarMr-13  |                                                                                                    |     |     |     |     |     | G.  |     |     |     |
| AfabmarMr-25  |                                                                                                    |     |     |     |     |     |     |     |     |     |
| AfabmarMr-51  |                                                                                                    |     |     |     |     |     |     |     |     |     |
| AfabmarMr-55  |                                                                                                    |     |     |     |     |     |     |     |     |     |
| AfabmarMr-58  |                                                                                                    |     |     |     |     |     |     |     |     |     |
| AfabmarMr-26  |                                                                                                    |     |     |     |     |     |     |     |     |     |
| AfabmarMr-27  |                                                                                                    |     |     |     |     |     |     |     |     | C.  |
| AfabmarMr-65  |                                                                                                    |     |     |     |     |     |     |     |     |     |
| AfabmarMr-76  |                                                                                                    |     |     |     |     |     |     |     |     |     |
| AfabmarMr-10  |                                                                                                    |     |     |     |     |     |     |     |     |     |
| AfabmarMr-96  |                                                                                                    |     |     |     |     |     |     |     |     | C.  |
| AfabmarMr-59  |                                                                                                    |     |     |     |     |     |     |     |     |     |
| AfabmarMr-94  |                                                                                                    |     |     |     |     |     |     |     |     |     |
| AfabmarMr-12  |                                                                                                    |     |     |     |     |     |     |     |     |     |
| AfabmarMr-63  |                                                                                                    |     |     |     |     |     |     |     |     |     |
| AfabmarMr-144 |                                                                                                    |     |     |     |     |     |     |     |     |     |
| AhedmarMr-700 |                                                                                                    |     |     |     |     | G.  | C.  |     |     |     |
| AhedmarMr-707 |                                                                                                    |     |     |     |     |     |     |     |     |     |
| AhedmarMr-712 |                                                                                                    |     |     |     |     |     |     |     |     |     |
| AhedmarMr-713 |                                                                                                    |     |     |     |     |     |     |     |     |     |
| AhedmarMr-9   |                                                                                                    |     |     |     |     |     |     |     |     |     |
| AhedmarMr-33  |                                                                                                    |     |     |     |     |     |     |     |     |     |
| AhedmarMr-51  |                                                                                                    |     |     |     |     |     |     |     |     |     |
| AhedmarMr-61  |                                                                                                    |     |     |     |     |     | T.  |     |     |     |
| AhedmarMr-74  |                                                                                                    |     |     |     |     |     |     |     |     |     |
| AhedmarMr-77  |                                                                                                    |     |     |     |     | G.  |     |     |     |     |
| AhedmarMr-293 |                                                                                                    |     |     |     |     |     |     |     |     |     |
| AhedmarMr-301 |                                                                                                    |     |     |     |     |     |     |     |     |     |
| AhedmarMr-544 |                                                                                                    |     |     |     |     |     |     |     |     |     |
| AhedmarMr-808 |                                                                                                    |     |     |     |     |     |     |     |     |     |
| AhedmarMr-815 |                                                                                                    |     |     | T.  |     | G.  |     |     |     |     |





|               | 1010 | 1020 | 1030 | 1040 | 1050 | 1060 | 1070 | 1080 | 1090 | 1100 |
|---------------|------|------|------|------|------|------|------|------|------|------|
| AfabmarMr-50  | T    | C    | A    | C    | C    | G    | A    | C    | C    | T    |
| AfabmarMr-54  | T    | C    | A    | C    | C    | G    | A    | C    | C    | T    |
| AfabmarMr-57  | T    | C    | A    | C    | C    | G    | A    | C    | C    | T    |
| AfabmarMr-13  | T    | C    | A    | C    | C    | G    | A    | C    | C    | T    |
| AfabmarMr-25  | T    | C    | A    | C    | C    | G    | A    | C    | C    | T    |
| AfabmarMr-51  | T    | C    | A    | C    | C    | G    | A    | C    | C    | T    |
| AfabmarMr-55  | T    | C    | A    | C    | C    | G    | A    | C    | C    | T    |
| AfabmarMr-58  | T    | C    | A    | C    | C    | G    | A    | C    | C    | T    |
| AfabmarMr-26  | T    | C    | A    | C    | C    | G    | A    | C    | C    | T    |
| AfabmarMr-27  | T    | C    | A    | C    | C    | G    | A    | C    | C    | T    |
| AfabmarMr-65  | T    | C    | A    | C    | C    | G    | A    | C    | C    | T    |
| AfabmarMr-76  | T    | C    | A    | C    | C    | G    | A    | C    | C    | T    |
| AfabmarMr-10  | T    | C    | A    | C    | C    | G    | A    | C    | C    | T    |
| AfabmarMr-96  | T    | C    | A    | C    | C    | G    | A    | C    | C    | T    |
| AfabmarMr-59  | T    | C    | A    | C    | C    | G    | A    | C    | C    | T    |
| AfabmarMr-94  | T    | C    | A    | C    | C    | G    | A    | C    | C    | T    |
| AfabmarMr-12  | T    | C    | A    | C    | C    | G    | A    | C    | C    | T    |
| AfabmarMr-63  | T    | C    | A    | C    | C    | G    | A    | C    | C    | T    |
| AfabmarMr-144 | T    | C    | A    | C    | C    | G    | A    | C    | C    | T    |
| AhedmarMr-700 | T    | C    | A    | C    | C    | G    | A    | C    | C    | T    |
| AhedmarMr-707 | T    | C    | A    | C    | C    | G    | A    | C    | C    | T    |
| AhedmarMr-712 | T    | C    | A    | C    | C    | G    | A    | C    | C    | T    |
| AhedmarMr-713 | T    | C    | A    | C    | C    | G    | A    | C    | C    | T    |
| AhedmarMr-9   | T    | C    | A    | C    | C    | G    | A    | C    | C    | T    |
| AhedmarMr-33  | T    | C    | A    | C    | C    | G    | A    | C    | C    | T    |
| AhedmarMr-51  | T    | C    | A    | C    | C    | G    | A    | C    | C    | T    |
| AhedmarMr-61  | T    | C    | A    | C    | C    | G    | A    | C    | C    | T    |
| AhedmarMr-74  | T    | C    | A    | C    | C    | G    | A    | C    | C    | T    |
| AhedmarMr-77  | T    | C    | A    | C    | C    | G    | A    | C    | C    | T    |
| AhedmarMr-293 | T    | C    | A    | C    | C    | G    | A    | C    | C    | T    |
| AhedmarMr-301 | T    | C    | A    | C    | C    | G    | A    | C    | C    | T    |
| AhedmarMr-544 | T    | C    | A    | C    | C    | G    | A    | C    | C    | T    |
| AhedmarMr-808 | T    | C    | A    | C    | C    | G    | A    | C    | C    | T    |
| AhedmarMr-815 | T    | C    | A    | C    | C    | G    | A    | C    | C    | T    |

|               | 1110 | 1120 | 1130 | 1140 | 1150 | 1160 | 1170 | 1180 | 1190 | 1200 |
|---------------|------|------|------|------|------|------|------|------|------|------|
| AfabmarMr-50  | T    | C    | A    | C    | C    | G    | A    | C    | C    | T    |
| AfabmarMr-54  | T    | C    | A    | C    | C    | G    | A    | C    | C    | T    |
| AfabmarMr-57  | T    | C    | A    | C    | C    | G    | A    | C    | C    | T    |
| AfabmarMr-13  | T    | C    | A    | C    | C    | G    | A    | C    | C    | T    |
| AfabmarMr-25  | T    | C    | A    | C    | C    | G    | A    | C    | C    | T    |
| AfabmarMr-51  | T    | C    | A    | C    | C    | G    | A    | C    | C    | T    |
| AfabmarMr-55  | T    | C    | A    | C    | C    | G    | A    | C    | C    | T    |
| AfabmarMr-58  | T    | C    | A    | C    | C    | G    | A    | C    | C    | T    |
| AfabmarMr-26  | T    | C    | A    | C    | C    | G    | A    | C    | C    | T    |
| AfabmarMr-27  | T    | C    | A    | C    | C    | G    | A    | C    | C    | T    |
| AfabmarMr-65  | T    | C    | A    | C    | C    | G    | A    | C    | C    | T    |
| AfabmarMr-76  | T    | C    | A    | C    | C    | G    | A    | C    | C    | T    |
| AfabmarMr-10  | T    | C    | A    | C    | C    | G    | A    | C    | C    | T    |
| AfabmarMr-96  | T    | C    | A    | C    | C    | G    | A    | C    | C    | T    |
| AfabmarMr-59  | T    | C    | A    | C    | C    | G    | A    | C    | C    | T    |
| AfabmarMr-94  | T    | C    | A    | C    | C    | G    | A    | C    | C    | T    |
| AfabmarMr-12  | T    | C    | A    | C    | C    | G    | A    | C    | C    | T    |
| AfabmarMr-63  | T    | C    | A    | C    | C    | G    | A    | C    | C    | T    |
| AfabmarMr-144 | T    | C    | A    | C    | C    | G    | A    | C    | C    | T    |
| AhedmarMr-700 | T    | C    | A    | C    | C    | G    | A    | C    | C    | T    |
| AhedmarMr-707 | T    | C    | A    | C    | C    | G    | A    | C    | C    | T    |
| AhedmarMr-712 | T    | C    | A    | C    | C    | G    | A    | C    | C    | T    |
| AhedmarMr-713 | T    | C    | A    | C    | C    | G    | A    | C    | C    | T    |
| AhedmarMr-9   | T    | C    | A    | C    | C    | G    | A    | C    | C    | T    |
| AhedmarMr-33  | T    | C    | A    | C    | C    | G    | A    | C    | C    | T    |
| AhedmarMr-51  | T    | C    | A    | C    | C    | G    | A    | C    | C    | T    |
| AhedmarMr-61  | T    | C    | A    | C    | C    | G    | A    | C    | C    | T    |
| AhedmarMr-74  | T    | C    | A    | C    | C    | G    | A    | C    | C    | T    |
| AhedmarMr-77  | T    | C    | A    | C    | C    | G    | A    | C    | C    | T    |
| AhedmarMr-293 | T    | C    | A    | C    | C    | G    | A    | C    | C    | T    |
| AhedmarMr-301 | T    | C    | A    | C    | C    | G    | A    | C    | C    | T    |
| AhedmarMr-544 | T    | C    | A    | C    | C    | G    | A    | C    | C    | T    |
| AhedmarMr-808 | T    | C    | A    | C    | C    | G    | A    | C    | C    | T    |
| AhedmarMr-815 | T    | C    | A    | C    | C    | G    | A    | C    | C    | T    |



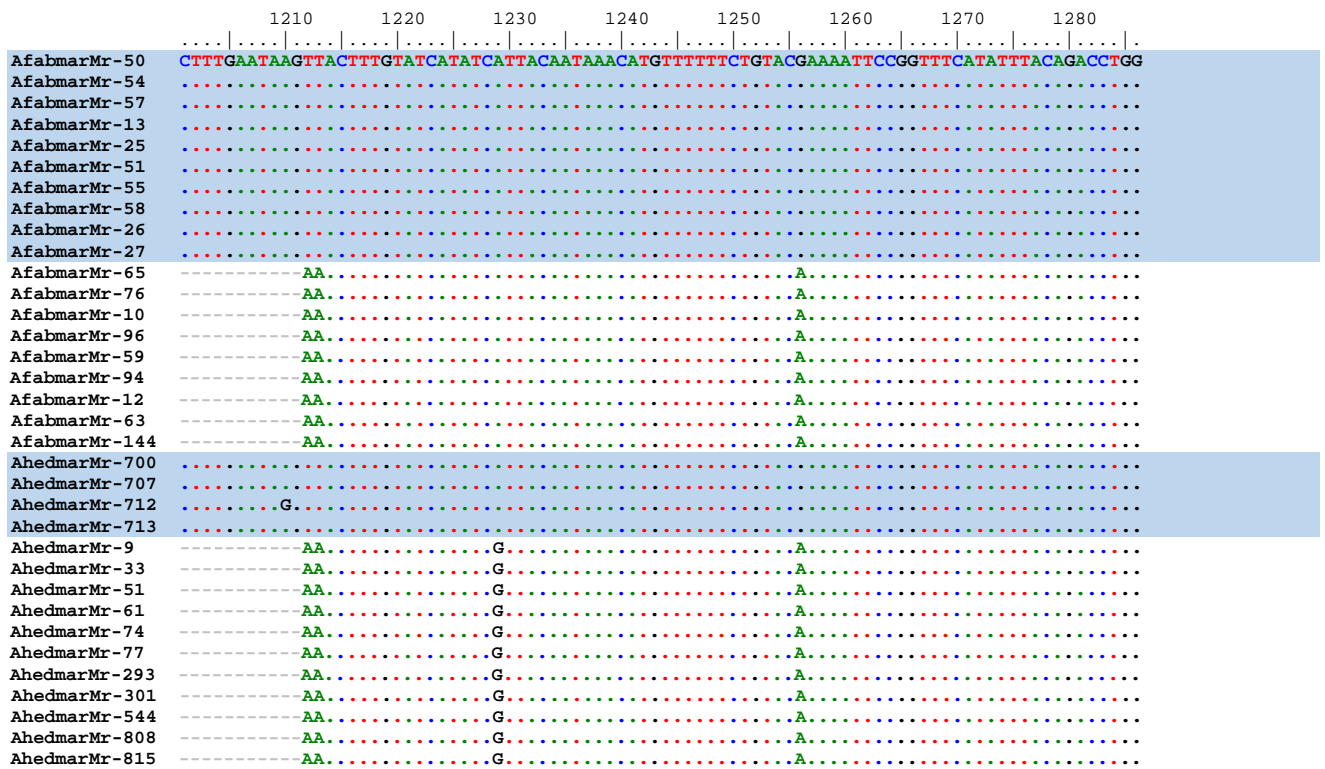

Figure S2. Sequence alignment of all *Afabmar-Mr* and *Ahedmar-Mr* *rmariner* sequences. Full-length copies of *mariners* in both species are marked with blue shading.

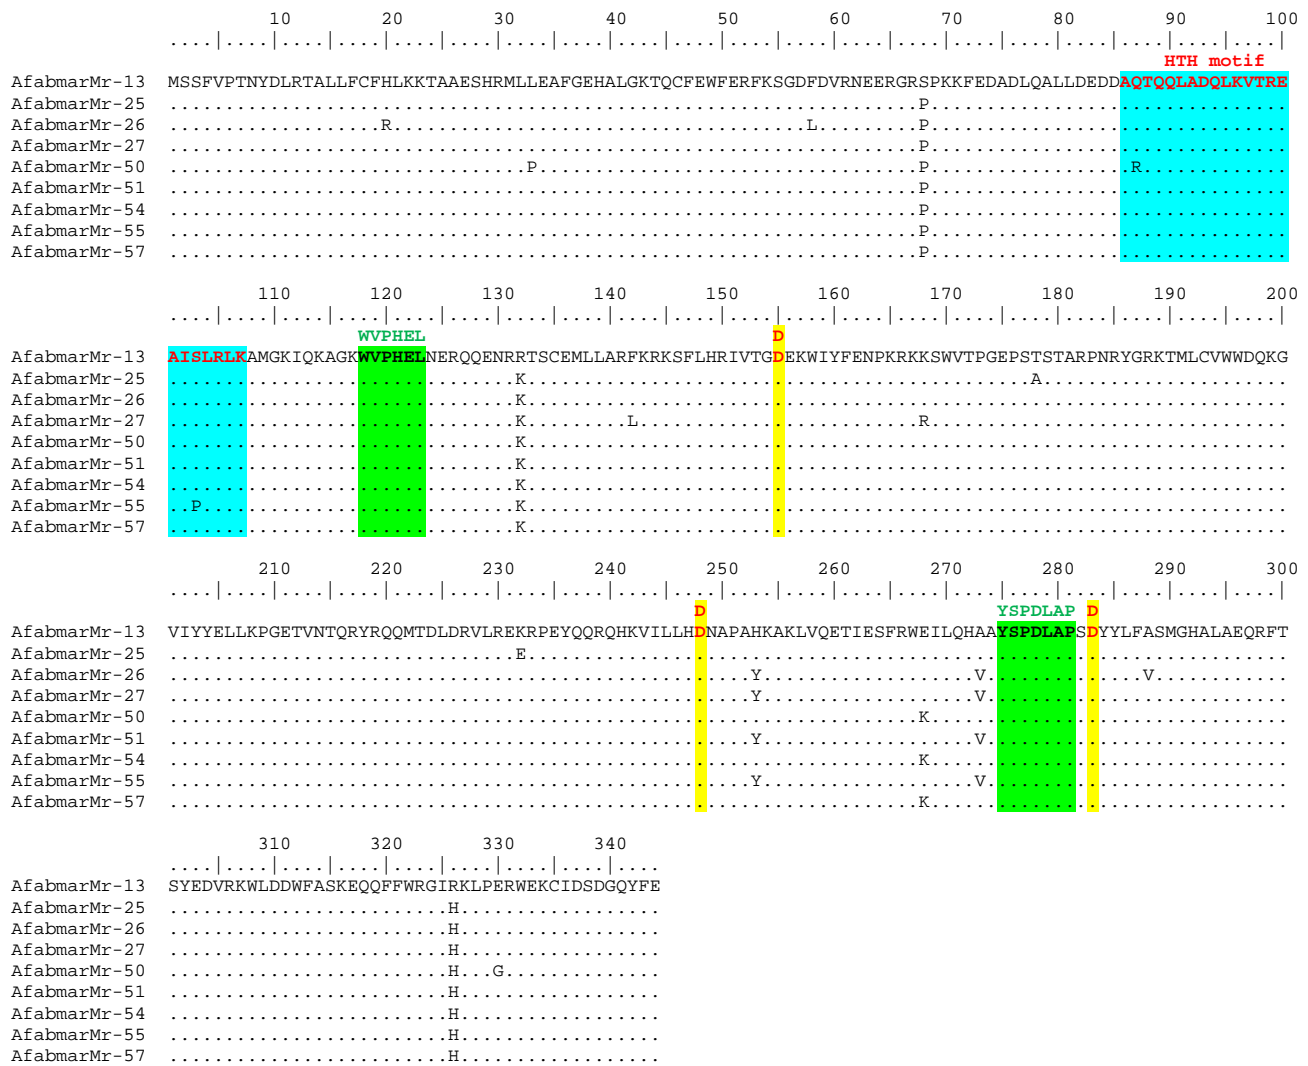

**Figure S3.** Sequence alignment of all putative *Afabmar-Mr* transposases. The conserved D,D(34)D motif, the also conserved *mariner* transposase WVPHEL and YSPDL motifs and the HTH motif are shown in different colors (yellow, green and blue respectively).

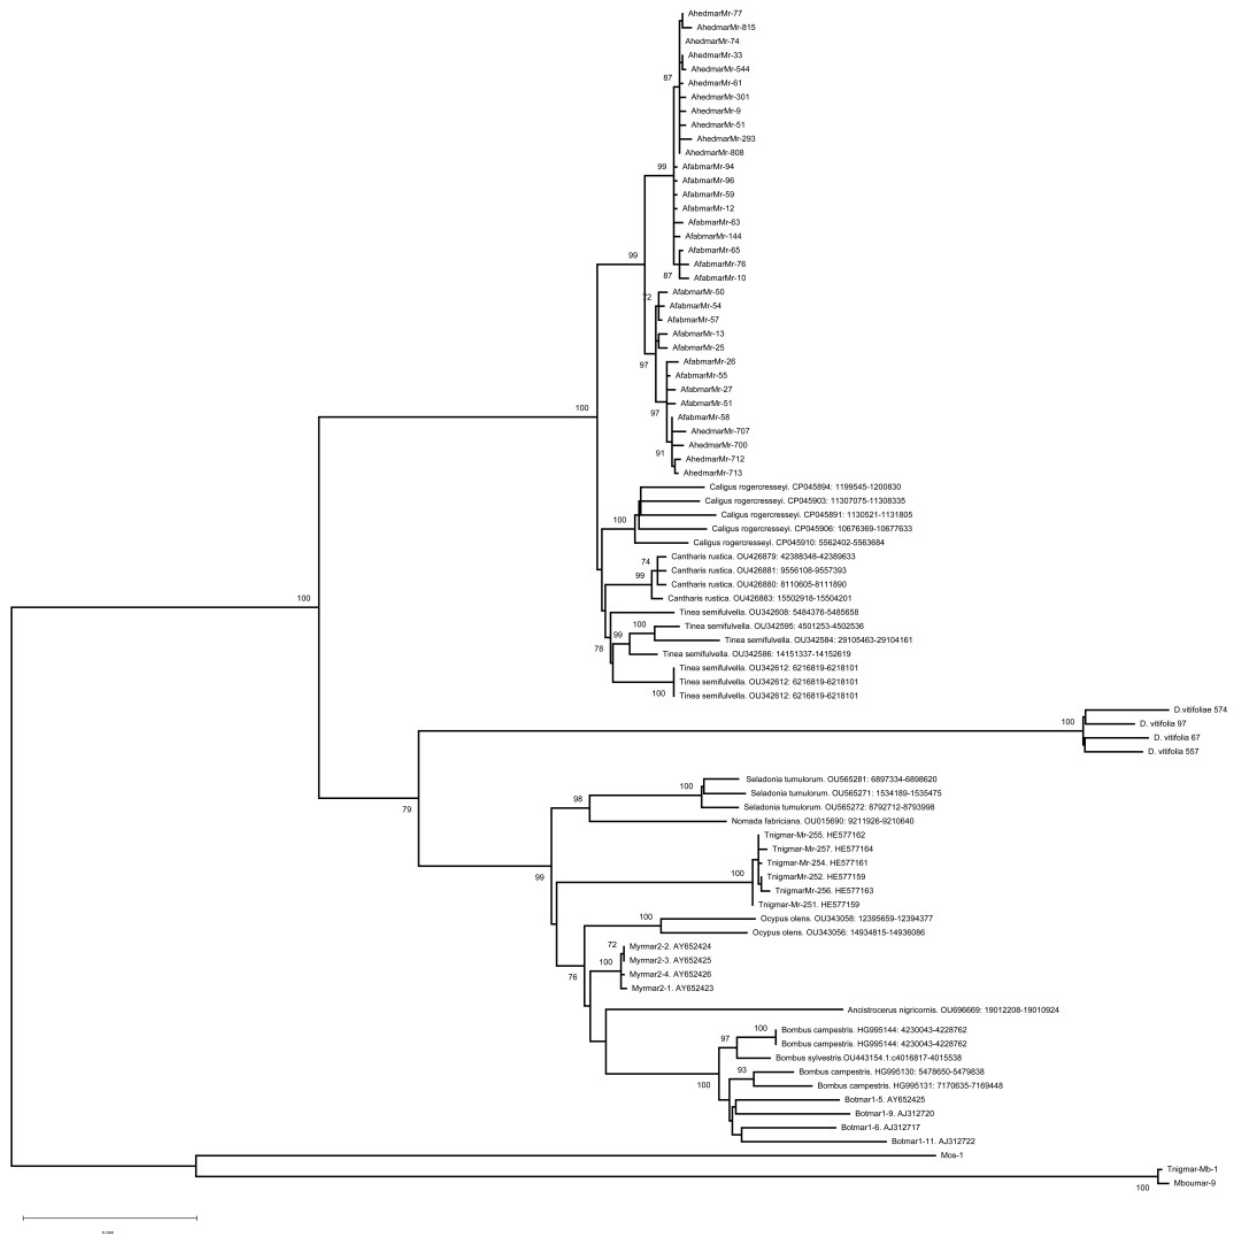

**Figure S4.** Maximum-likelihood analysis of the nucleotide *Myrmar* like *mariner* sequences. The accession numbers and nucleotide position of each *mariner* element are indicated. The data corresponding to the sequences of *Daktulosphaira vitifoliae* are shown in Figure S5. Numbers indicate the bootstrap values over 1000 replications. Only bootstrap support values greater than 70% are showed.

```

>scaffold67 Apollo scaffold67:195087..196370 (+ strand) length=1284
CCAGGTGTGTAAATATGAAACCGGAATTTGCCGATAGGTGACACTACCTATTGATACCGTAACCCATTTTCACTTGTATTGTGTCGTGTTGTTTGGGTGAC
TTATGCGCACGAGTTTCCAACTCGTACCAGCGAAAGTTTCATTTAGTAGTGTAGTGAGGCTCGTGTGAAACATGTGCGAAGTTTGTGCCAAGAAAGTATGATT
TGCGGACAGCGTTGATCTTTTGTTCATCTGAAGAAAACATGCATCAGAATCGCATCAAATGCTTGTGGAAGCTTACGGTGAGCATGCTCTGGGAAAGTCA
CAGTGTGTTTGTAGTGTTCAGAGAAATTTAAAGTGCGGATTTTCGATGTGAGGGATGCAGAACGTGGTCGACCACCGAAAAAGTTTGAAGATAATGAGTTGCA
AGCGTTGTTGGATGAGGATGCAACACAAACCCAAAAACAATTCGAGATCAATTGAATGTGACCCGGGACGCCGTATCCATTTCGTTTGAAGCCATGGGAA
AGATCCAAAAGGTTTGGAAAATGGGTTCCACATCAACTGACGGAAAGGCAACGGGAAAACTGACAAAACCATTTGCGAAATGCTGATCGCCAGGCACAGAATA
AAATCTTTTCTCCATTACATTGTAAGTGGCGATGAAAAATGGATATATTTTGAAGATCCTAAGCGACAAAAATCATGGGTAGCTCCAGGAGAAACAATCAAA
GTCGAGTGCGAGGCCAAATCGCTTTGGAAGAAAAACAATGCTCTGTGTTTGGTGGGATCAGAAGGGTGTTATCTATTATGAGCTTCTTAAACCTGGCGAAA
CTGTCAACACTGAACGTTTACCTACAACAATATCAAAATTTGTTTCAAGCTTTGGAAGACAAACGGCCGGAATTTCAACGACGGCAACACCAGGTGATTTTG
CTTTACGCAATAACTTCCGACACACCGCTAAAGTGGTCAAGGAATTAATCGAGGCGTTTGGTTGGGAGACTTTATCGCATGCCGCTTATTCCGCCAGACTT
GGCTTCTTCAGACTACCATTTATTGTCATCTTTGGGACACGCACTCGCTGAGCAGCGCTTCTCTTCTACGAAGATGTGCAAAAATAGTTTCGACAATTGGT
TTGCGTCAAAAGAGCAACAATTTCTTCTGGCGTGAATCCATAAAATGCCCCGAAAGATGGGAAAAATGTATAAGTAGCGAAGGGCAATACTTTGAATAGGAT
GTATAGTATCA GTCTTGTAACAATAAACTAGTATTTTATGTCAAATAATTCGGTTTCATATTTACACACCTGG

>scaffold557 Apollo scaffold557:100292..101408 (+ strand) length=1117
AAACATGTGCGAAGTTTGTGCCAGGAAAGTATGATTGCGGACAGCGTTGATCTTCTGTTTCCATCCGAAGAAAACTGCGTCAAAATCGCATCAAATGCTTG
TGGAAGCTTACGGTGAGCATGCTCTGGGGAAGTCAAGTGTGTTTGTAGTGGTTCAAGAAATTTAAAGTGCGGATTTTCGATGTGAGGGATGCAGAACGAAGT
CGACCACGAAAGTTTGAAGTTCAGAGTTCGCAAGCGTTGTCAGAGCTTGAAGCAACCCAAAAACAACCTGCGAGATCAATTGAATGTGACCCG
GGAAGCCGTATCCATTTCGTTTGAAGCCATGGGAAAGATCCAAAAGTGGAAGAAATGGGTTCCACATCAACTGACGGAAAGGCAACGGGAAAAACCGACAAA
CCACTTGTGAAATGCTGCTCGCCAGGCACAGAATAAAATCTTTTCCATCGCATTTGTAAGTGGCGATGAAAAATGGATATATTTTGAATCCTAAGCGA
CAAAAATCATGGGTAGCTCCAGGAGAACCATCAAAGTTCGAGTGCAGGCGCAAAATCGCTTTGGAAGAAAAACAATGCTCTATGTTTGGTGGGATTAGAAGGG
TGTTATCTATTATGAGCTTCTTAAACCTGGCGAAACTGTCAATACTGAACGTTACCTACAACAACCTGTCAAATGTGTTTCAAGCTTTGGAAGACAAACGGC
CGGAACCTTCAACGACGGCAACACCAGGTGATTTTGCTTCACGACAATGCTCCGGCACACAGGGCTAAAGTGGTTTAGGAATTAATCGAGGCGCTTTGGTTGG
GAGACTTTATCGCATGCCGCTTATTCGCCAGACTTGGCTCCTTCAGACTACCATTTATTTGTCATCTTTGGGACACGTAATCGCTGAGCAGCGCTTTTTC
CTACGAAGATGTGCAAAAATAGCTCGACAATTTGGTTTGCCTCAAAAGAGCAACAATTTCTTCTGGCGTGAATCCATAAAATGCCCGAAAGATGGGAAAAAT
GTATAAGTAGCGAAGGGCAATACTTCGAATAGGATGTATAGTATCAGTTTTGTACGATAAACTAGTATTTTATGTCAAATAAATTCGGTTTCATATTTACA
CACCTGG

>scaffold97 Apollo scaffold97:110013..111289 (- strand) class=match length=1277
CCAGGTGTGTAAATATGAAACCGGAATTTGCCGATAGGTGACGCTACCTATTGATACCGTAACCCATTTTCACTTGTATTGTGTCGTGTTGTTTGGGTGAC
TTATGCGCACGAGTTTCCAACTCGTACCAGCGAAAGTTTTCATTTAGTAGTGTAGTGAGGCTCGTGTGAAACATGTGCGAAGTTTGTGCCAGGAAAGTATGATT
TGCGGACAGCGTTGATCTTCTGTTTCCATCTGAAGAAAACATGCGTCAGAATCGCATCAAATGCTTGTGGAAGCTTACGGTGAGCATGCTCTGGGGAAGTCA
CAGTGTGTTTGTAGTGGTTCAAGAAATTTAAAGTGCGGATTTTCGATGTGAGGGATGCAGAACGTGGTCGACCACCGAAAAAGTTTGAAGACAACGAGTTGCA
AGCGTTGTTGGATGAGGATGCAACGCAACCCAAAAACAACCTGTCAGATCAATTGAATGTGACCCGGGAAGCCGTATCCATTTCGTTTGAAGCCATGGGAA
AGGTGGGAAATGGGTTCCACATCAACTGACGGAAAGGCAACGGGAAAAACCGACAAAACCACTTGCAGAAATGCTGCTCGCCGGGCACAGAATAAAATCTTTT
CTCCATCGCATTTGTAAGTGGCGATGAAAAATGGATATATTTTGAAGATCCTAAGAAACAAAAATCATGGGTAGAGCTCCAGGAGAACCATCAAAGTTCGAGT
GCGAGGCCAAATCGCTTTGGAAGAAAAACAATGCTCTGTGTTTGGTGAAATCAGAAGGGTGTATCTATTATGAGCTTCTTAAACCTGGCGAAAATGTCAA
CACTGAACGTTTACGTACAACAATTTGTTTCAAGCTTTGGAAGACAAACGACCGGAACCTTCAACGACGACAACACCAGGTGATTTTGCTTTCATG
ACAATGCTCTGGCACACATGGCTAAAGTGGTCAAGGAATTAATCGATGTGTTTGGTTGGGAGACTTTATCGTATGCCGCTTATTCGCCAGACTTGGCTCCT
TCAGAATACCATTTATTTGTCATCTTTGGGACACGCACTCGCTGCGCAGCGCTTCTCTTCTACAGAGATGTGCAAAAATGGCTCGACAATTTGGTTTGGGTC
AAAAGAGCAACAATTTCTTCTGGCGTGAATCCATAAAATGCCCGAAAGATGGGAAAAATGTATAAGTAGCGAAGGGCAATACTTCGAATAGGATGTATAGT
ATCAGTTTTGTACAATAAACTAGTATTTTATGTCAAATAAATTCGGTTTCATATTTACACACCTGG

>scaffold574 Apollo scaffold574:127835..128944 (+ strand) class=match length=1270
AAACATGTGCGAAGTTTGTGCCAGGAAAGTATGATTGCGGACAGCGTTGATCTTCTGTTTCCATTTAAAGAAAACTGCGTCAAGATCGCATCAAATGCTTG
TGGAAGCTTACGGTGAGCATGCTCTGGGAGAGTCACAGTATTTTGTAGTGGTTGAAGAAATTTAAAGTGCGGATTTTCGATGTGAGGGATACAAAACGTGGT
CGACCACGAAAAAGTTTGAAGACAACGAGTTGCAAGCGTTGTTGGATGAGGATGCAACGCAACCCAAAAACAACCTGCGAGATCAATTGAATGTGACCCG
GGAAGCCGTATCCATTTCGTTTGAAGCCATGGGAAAGATCCAAAAGTGGAAGAAATGGGTTCCACATCAACTGACGGAAAGGCAATGGGAAAAACCGACAAA
CCACTTGCAGAAATGCTGCTCGCCAGGCACAGAATAAAATCTTTTCCATCGCATTTGTAAGTGGCGATGAAAAATGGATATATTTTGAAGATCCTAAGCAA
CAAAAATCATGGGTAGCTCCAGGAGAACCTTCAAAGTTCGAGTGCAGGCGCAAAATCGCTTTGGAAGAAAAACAATGCTCTGTGTTTGTATGGGATCAGAAGGG
TGTTATCTATTATGAGCTTCTTAAACCTGGCGAAACTGTCAACACTGAACGTTACCTACAACAACCTGTCAAATTTGTTTCAAGCTTTGGAAGACAAACGGC
CCGAACCTTCAACGACGGGAACAGCAGATGATTTTGCTTCACGACAATGCTCCGGCACACAGGGCTAAAGTGGTCAAATCGAGGCGTTAGGTTGGGAGACTT
TATGGCATGCCGCTTATTCGCCAGACTTGGCTCCTTCAGACTACCATTTATTTGTCATCTTTGGGACACGCAATCGCTGAGCAGCGCTTCTCTTCTACGAA
GATGTGCAAAAATGGCTCGAAAATTTGGTTTGCCTCAAAAGAGCAAGAATTTCTTCTGGCGTGAATCCATAAAATGCCCTAAGATGGGAAAAATGTATAAG
TAGCGAAGGGCAATACTTCGAATGGGATGTATAGTATCAGTTTTGTACAATAAACTAGTATTTTATGTCAAATAAATTCGGTTTCATATTTACATACCTGG

```

Figure S5. Sequences found in the *Daktulosphaira vitifoliae* genome with similarity with the *Myrmar* elements. These sequences were obtained from the AphidBase web server (<https://bipaa.genouest.org/is/aphidbase/>).
